# Supplementary material for: Paper-based analytical device for point-of-care nucleic acid quantification combining CRISPR/Cas12a and a personal glucose meter
Source: Royal Society of Chemistry journal article supplement (doi:10.1039/d4an00905c), 2024-01-01
Supplement: d4an00905c1.pdf [file d4an00905c1.pdf]

## **Paper-based Analytical Device for Point-of-care Nucleic Acid Quantification Combining CRISPR/Cas12a and Personal Glucose Meter**

Yohei Tanifuji, Guodong Tong, Yuki Hiruta, Daniel Citterio\*

Department of Applied Chemistry, Faculty of Science and Technology, Keio University, 3-14-1 Hiyoshi, Kohoku-ku,

Yokohama 223-8522, Japan. E-mail: citterio@aplc.keio.ac.jp; Tel: +81 45 566 1568

\*To whom correspondence should be addressed.

Email: citterio@aplc.keio.ac.jp

### **Table of Contents**

|                                                                                       |     |
|---------------------------------------------------------------------------------------|-----|
| <b>Experimental procedure.</b> Assay with freeze-dried MB conjugates in microtube     | S2  |
| <b>Table S1</b> Sequences of nucleic acids                                            | S3  |
| <b>Table S2</b> Estimated material costs to fabricate the fully integrated device     | S4  |
| <b>Fig. S1</b> Evaluation of amount of invertase immobilized on MBs                   | S5  |
| <b>Fig. S2</b> Wax printing pattern                                                   | S6  |
| <b>Fig. S3</b> Hydrophobicity of the surface of time adjustment film                  | S7  |
| <b>Fig. S4</b> Photograph of the fabricated PAD for basic evaluation                  | S8  |
| <b>Fig. S5</b> Illustrations and photograph of fully integrated device                | S9  |
| <b>Fig. S6</b> SEM images with using various pore size of paper and MB size           | S10 |
| <b>Fig. S7</b> SEM images after drying MB conjugates                                  | S11 |
| <b>Fig. S8</b> Workability of trehalose as stabilizer for freeze-drying MB conjugates | S12 |
| <b>Fig. S9</b> Droplet behavior depending on orientation of wax-printed paper surface | S13 |
| <b>Fig. S10</b> Scheme of sample flow inside a paper substrate                        | S14 |

### **Assay with freeze-dried MB conjugates in microtubes**

2  $\mu\text{L}$  of 10 mg/mL MB conjugate in buffer E with 0 or 40 mg/mL of trehalose was added in a 0.5 mL microtube, followed by freeze-drying for 60 min (snap freezing by liquid nitrogen followed by vacuum application). During drying, a solution containing 100 nM Cas12a and 200 nM crRNA in buffer D with 0 or 40 mg/mL of trehalose was pre-incubated for 15–30 min, 3  $\mu\text{L}$  of which was then added to the microtube with freeze-dried MB conjugates. After addition of 3  $\mu\text{L}$  of buffer D and 2  $\mu\text{L}$  of 0 or 100 nM tgDNA in autoclaved water, the mixture was incubated on a rotator for 60 min. Subsequently, 4  $\mu\text{L}$  of supernatant was separated using a magnetic stand and added to 8  $\mu\text{L}$  of sucrose solution (6  $\mu\text{L}$  of 1 M sucrose, 1.2  $\mu\text{L}$  of buffer F, and 0.8  $\mu\text{L}$  of autoclaved water). After additional incubation for 60 min, the concentration of produced glucose was measured by the PGM.

**Table 1** Sequences of nucleic acids used in this report

| Name                    | Sequence (5'→3')                                                                                 |
|-------------------------|--------------------------------------------------------------------------------------------------|
| tgDNA (double-stranded) | TTTTTTTTTTAGTACATTGCAAGATACTAAATGTGAGGTACCA                                                      |
| crRNA                   | UAAUUUCUACUAAGUGUAGAUGUACAUUGCAAGAUACUAAA                                                        |
| ssDNA                   | Biotin-TTATTATTATTATTATTATTATTATTATTA-disulfide-(CH <sub>2</sub> ) <sub>6</sub> -CH <sub>3</sub> |

**Table S2** Estimated material costs to fabricate the paper-based device

| Material          | Price (USD per device) |
|-------------------|------------------------|
| MB conjugate*     | 0.824                  |
| Cas12a protein    | 0.037                  |
| crRNA             | 0.005                  |
| Sucrose           | <0.001                 |
| Filter paper      | 0.013                  |
| OHP film          | <0.001                 |
| Lamination film   | <0.001                 |
| Double-sided tape | <0.001                 |
| Total             | 0.984                  |
| PGM electrode**   | 0.866                  |

\*Calculated based on cost of invertase, crosslinker, ssDNA, and streptavidin-coated MBs.

\*\*PGM electrodes were bought from LifeScan Japan (Tokyo). The market price depends on the seller.

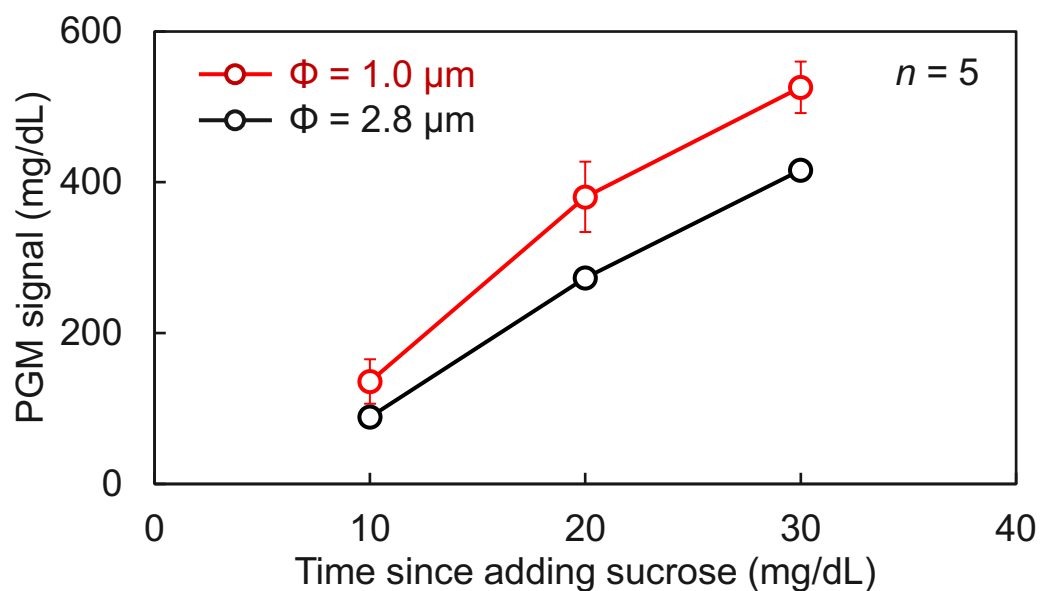

**Fig. S1** Changes of PGM signal over time from adding 8  $\mu\text{L}$  of sucrose solution (6  $\mu\text{L}$  of 1 M sucrose in autoclaved water, 1.2  $\mu\text{L}$  of buffer F, and 0.8  $\mu\text{L}$  of autoclaved water) to 4  $\mu\text{L}$  of 10 mg/mL MB conjugate; error bars represent the mean values  $\pm 1\sigma$  ( $n = 5$ ). Increase of the PGM signal indicates the successful immobilization of invertase on the surface of MBs, and indirectly indicates the amount of immobilized invertase.

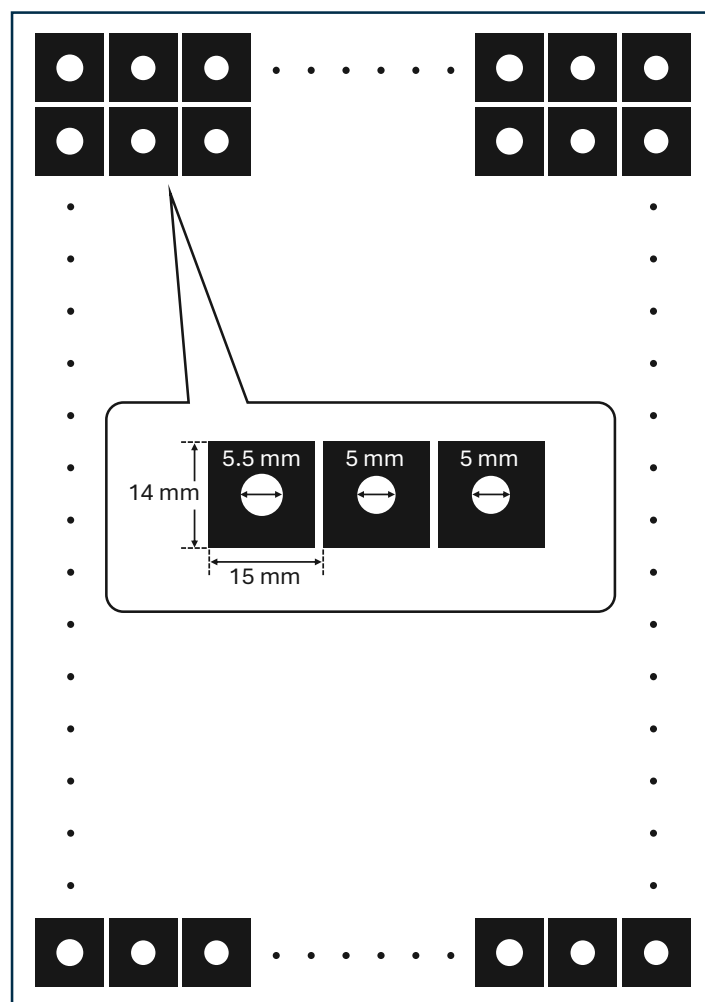

**Fig. S2** The wax printing pattern designed using Adobe Illustrator CC software. Black areas were printed using the wax-printer.

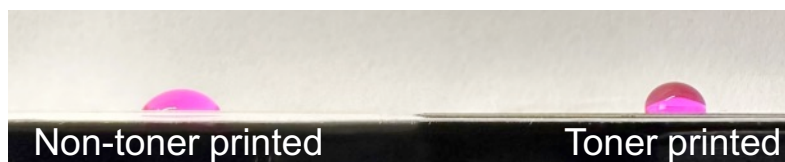

**Fig. S3** Comparison of water droplet behaviour on non-toner modified transparency film (left) and toner printed film (right). The picture indicates a larger contact angle for the toner-modified film, proving the successful hydrophobic treatment of the transparency film by toner printing.

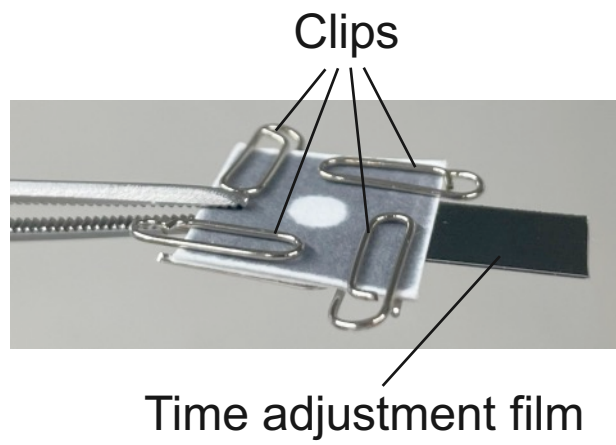

**Fig. S4** Photograph of the PAD used for basic evaluation.

**A**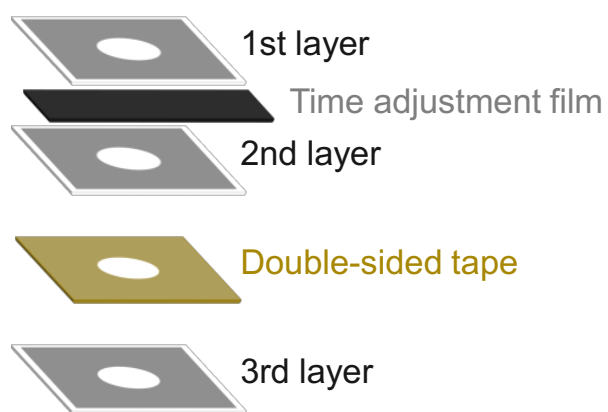**B**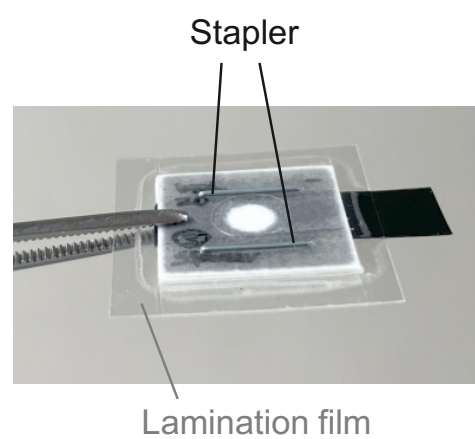

**Fig. S5** (A) Illustration of the sandwich structure consisting of three paper-layers, time adjustment film, and double-sided tape. (B) Photograph of the fully integrated device.

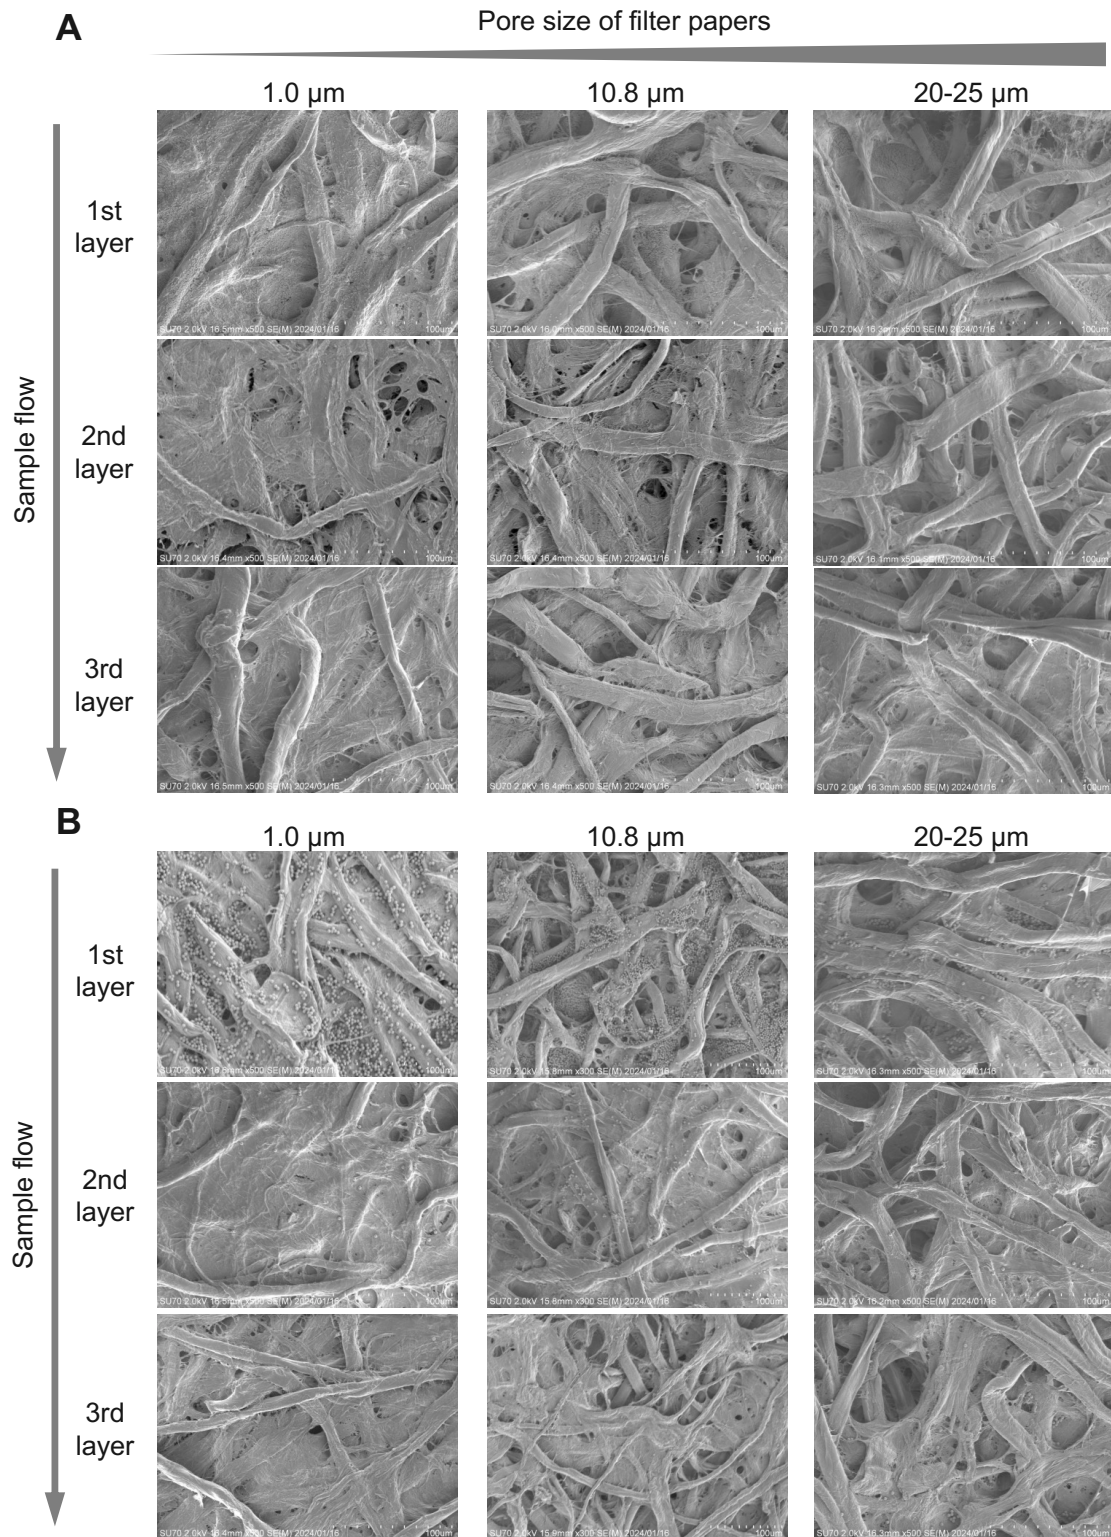

**Fig. S6** SEM images of the front side of each paper layer after assays without adding sucrose solution with using different pore size of filter papers and (A) 1.0 and (B) 2.8  $\mu\text{m}$  of MBs. It can be confirmed that the number of MBs on 2<sup>nd</sup> and 3<sup>rd</sup> layer is decreased as MBs size increases and pore size of filter papers decreases, suggesting successful filtration of MBs by filter papers.

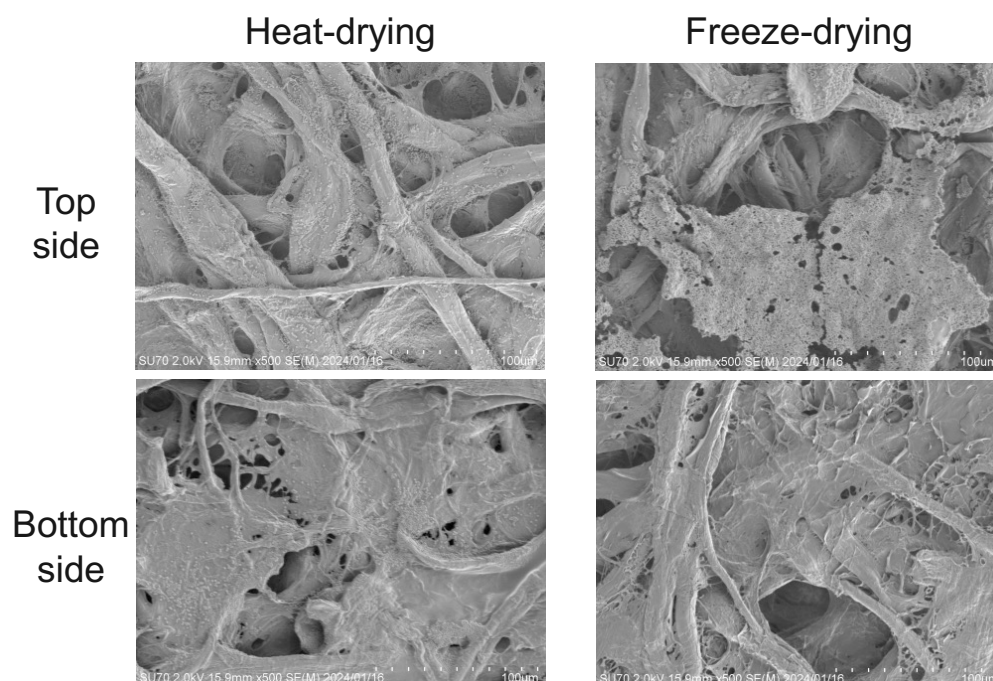

**Fig. S7** SEM images of the top and bottom sides of paper substrates (A5C) on which MB conjugates and Cas12a-crRNA complex have been (left) heat-dried or (right) freeze-dried. The presence of MB conjugates was confirmed on both sides of the paper substrate in the case of heat-drying, while they were observed only on the top side when freeze-dried.

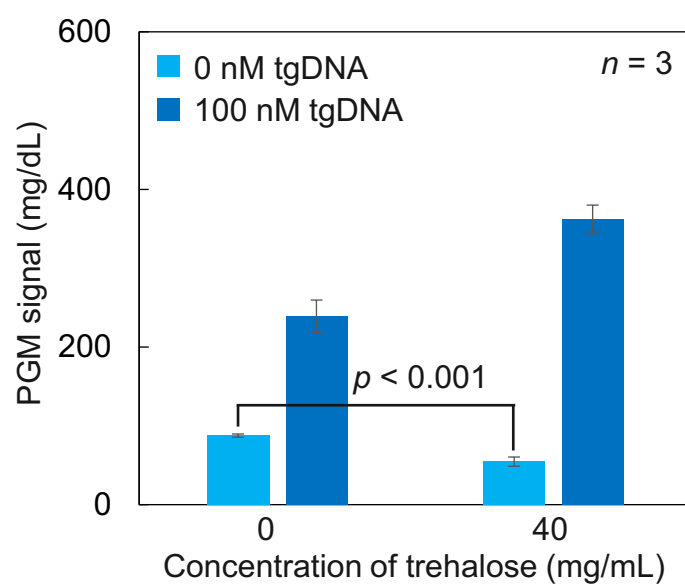

**Fig. S8** Influence of presence of trehalose during freeze-drying of MB conjugates in microtubes; error bars represent the mean values  $\pm 1\sigma$  ( $n = 3$ ). In the case of experiments performed in microtubes, the addition of trehalose during freeze-drying had a positive influence on both the blank and the tgDNA-positive signals. This contrasts with the observations on the paper substrate (Fig. 3A of the main text), where the tgDNA-positive signal did not increase upon addition of trehalose, presumably due to the enzymes being already sufficiently stabilized by BSA used for paper blocking.

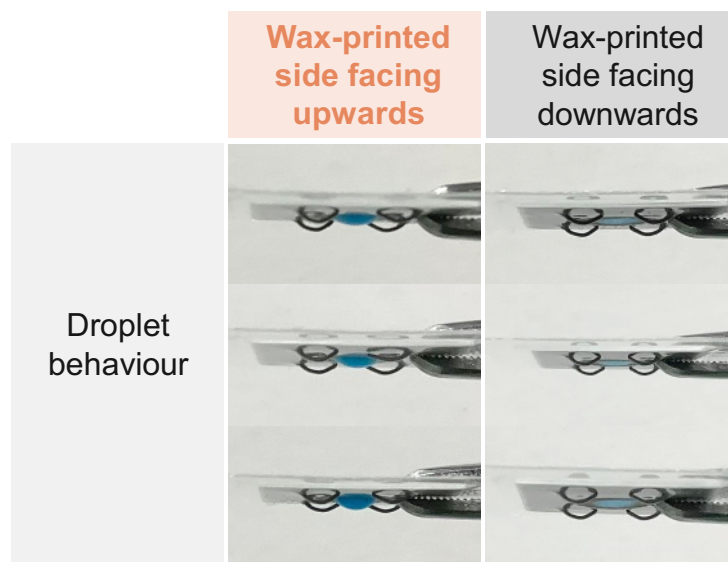

**Fig. S9** Dependence of liquid dye droplet formation on orientation of wax-printed paper side in a fully integrated multilayer paper device: (A) wax-printed side facing upwards and (B) wax-printed side facing downwards.

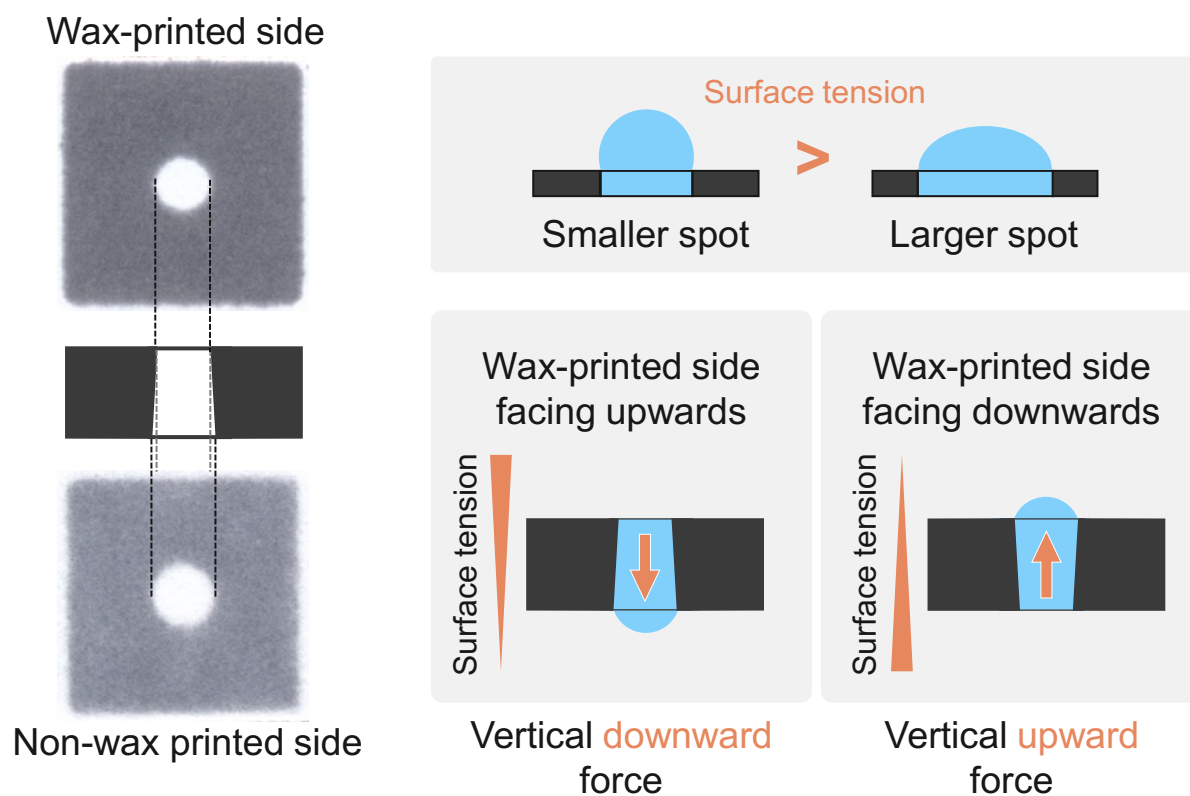

**Fig. S10** Schematic of the dependence of wax-printed paper orientation on vertical sample flow caused by the conical frustum shape of a wax-patterned circular spot.
